# Supplementary material
Source: PubMed Central journal article supplement (PMC3837963)
Supplement: JB.00697-13_zjb999092902so1.pdf [file JB.00697-13_zjb999092902so1.pdf]

**Table S1- Primers used in this study**

| <b>Primers</b> | <b>Sequence</b>                    |
|----------------|------------------------------------|
|                | <b>RT-qPCR</b>                     |
| 16S rRNA F     | CCT GGT AGT CCA CGC CGT            |
| 16S rRNA R     | TGC GTT AGC TGC AGC ACT AAG        |
| secY F         | TCC TGG TCG GGA AAC ACA AG         |
| secY R         | CCG CTG AAA GGA AAA TTG CA         |
| secG F         | ACG GTC TTA CTC ATC ATC GTA TCA GT |
| secG R         | CCG GAT AAG CCA GCA CTT TTA        |
| secDF F        | CCG AGT ATT CAA ATC GAA GGA AA     |
| secDF R        | ATT GGG CTG TGG TCG ATA GC         |
| secA1 F        | ATG ATG GAA CGC TTT GGT ATG G      |
| secA1 R        | CGT CTT TGT GCG GAT TCA ACT        |
| secA2 F        | TGG ATG CGG TTG TAG TGC AA         |
| secA2 R        | ACC TTC GCC GGT TTT CAT TT         |
| yajC F         | GCA ATT GAA GAT GGC ACA GTC A      |
| yajC R         | CAA GTA CAG TTC TGA TTG CGT TAC G  |
| yidC1 F        | GCA GTC GGA ATT ATC GTT GTT ACA    |
| yidC1 R        | TTT TGG CTT TTC AGC TGT TTG A      |
| yidC2 F        | TCC GTG CAC TAA TTA TGC CAC TA     |
| yidC2 R        | TTT GGC AAC GGC CAT TTT            |
| IFN- $\beta$ F | CCA AGA AAG GAC GAA CAT TCG        |
| IFN- $\beta$ R | CCG CCC TGT AGG TGA GGT T          |
| IL-6 F         | TTCCATCCAGTTGCCTTCTTG              |
| IL-6 R         | GAAGGCCGTGGTTGTCACC                |

|                            |                                                                                                           |
|----------------------------|-----------------------------------------------------------------------------------------------------------|
| TNF- $\alpha$ F            | GCACCACCATCAAGGACTCAA                                                                                     |
| TNF- $\alpha$ R            | TCGAGGCTCCAGTGAATTCG                                                                                      |
| GAPDH F                    | TTGTGGAAGGGCTCATGACC                                                                                      |
| GAPDH R                    | TCTTCTGGGTGGCAGTGATG                                                                                      |
| secDF A                    | <b>PCR primers for gene deletions and genomic manipulations</b><br>AAA <u>ACCCGGGGTGGCGCTATTATGGAAGAT</u> |
| secDF B                    | ATGAAATTCGGCCGTTTCGTTTTTATACTACCATTCTGTTTCGTTCC<br>TCCCT                                                  |
| secDF C                    | AGGGAGGAACGAAACAGAAATGGTAGTATAAAAACGAACGGCCG<br>AATTTCAT                                                  |
| secDF D                    | TTTT <u>TCTAGAGCCGCAATACCATTATCAAC</u>                                                                    |
| secDF<br>complementation A | AAAACGGCCGATGGTAAAAAAGAGTAAGATAGT                                                                         |
| secDF<br>complementation B | AAA <u>ACTGCAGTTATACGACAGGTTGTCCG</u>                                                                     |
| secDF<br>complementation C | AAAACGGCCGGCCTGTTAGCAAATGCTT                                                                              |
| yidC1 A                    | AAAAT <u>TCTAGATATTTACAAAGGTGCGCC</u>                                                                     |
| yidC1 B                    | ATTGATATTATACAATAGTAAAATAATCAATTC                                                                         |
| yidC1 C                    | TTATTTTACTATTGTATAATATCAATCCAATGC                                                                         |
| yidC1 D                    | TTTT <u>CCCGGGTTAATAAGGTTTGACCCGC</u>                                                                     |
| actA A                     | AAA <u>AGGATCCAGAAATTGATCGCCTAGCTG</u>                                                                    |
| actA B-his                 | ATGATGATGATGATGATGACC <u>AGTACTATTATTTTTCTTAATTGA</u><br>ATA                                              |
| actA C-his                 | <u>AGTACTGGTCATCATCATCATCATTA</u> AAAAACACAGAACGAAA<br>GA                                                 |
| actA D                     | TTTT <u>TCTGCAGTTTTGCTACCATGTCTTCCG</u>                                                                   |
